# Supplementary material for: Biomarker vs MRI-Enhanced Strategies for Prostate Cancer Screening: The STHLM3-MRI Randomized Clinical Trial
Source: PubMed Central journal article supplement (PMC11036143; doi:10.1001/jamanetworkopen.2024.7131), 2024-04-22

## Supplemental Online Content

Björnebo L, Discacciati A, Falagario U, et al. Biomarker-based vs MRI-enhanced strategies for prostate cancer screening: the STHLM3-MRI randomized clinical trial. *JAMA Netw Open*. 2024;7(4):e24713. doi:10.1001/jamanetworkopen.2024.7131

**eTable 1.** Relative Proportions of Men with MRI Scans, Biopsies, and Prostate Cancers According to Screening Strategies (Ignoring Biopsy Outcomes for Men in the MRI-Enhanced Group With Negative MRI Results who Underwent Biopsy due to a Stockholm3 Risk Score of 0.25 or Higher)

**eTable 2.** Relative Proportion of Men with MRI Scans, Biopsies, and Prostate Cancers According to Screening Strategies (Only Including Men Who Underwent Systematic Biopsies in the MRI-Enhanced Group)

**eTable 3.** Gleason Score at Biopsy vs at Prostatectomy in Biomarker-Based Group and MRI-Enhanced Group

**eTable 4.** Gleason Score at Systematic Biopsy vs Combined Systematic and Targeted Biopsy for Men in MRI-Enhanced Group who Underwent Both Types of Biopsies

**eFigure.** Gleason Score on Systematic Biopsy vs Combined Systematic and Targeted Biopsy for Men in MRI-Enhanced Arm who Underwent Both Types of Biopsies

This supplemental material has been provided by the authors to give readers additional information about their work.

**eTable 1.** Relative Proportions of Men with MRI Scans, Biopsies, and Prostate Cancers According to Screening Strategies (Ignoring Biopsy Outcomes for Men in the MRI-Enhanced Group With Negative MRI Results who Underwent Biopsy due to a Stockholm3 Risk Score of 0.25 or Higher)

| Outcome/Strategy                                | MRI-enhanced arm (N = 7609) | Biomarker arm (N = 5134) |                              |                       |                              |                    |                              |
|-------------------------------------------------|-----------------------------|--------------------------|------------------------------|-----------------------|------------------------------|--------------------|------------------------------|
|                                                 | PSA $\geq$ 3 ng/ml          | Stockholm3 $\geq$ 15%    | Relative proportion (95% CI) | Stockholm3 $\geq$ 11% | Relative proportion (95% CI) | PSA $\geq$ 3 ng/ml | Relative proportion (95% CI) |
| Participants with elevated test, n (%)          | 929 (12)                    | 413 (8.0)                | 0.66 (0.59 to 0.74)          | 680 (13)              | 1.08 (0.99 to 1.19)          | 603 (12)           | 0.96 (0.87 to 1.06)          |
| MRIs, n (%)                                     | 846 (11)                    | 1 (<0.1)                 | -                            | 1 (<0.1)              | -                            | 1 (<0.1)           | -                            |
| Biopsy procedures, n (%)                        | 304 (4.0)                   | 326 (6.3)                | 1.43 (1.23 to 1.66)          | 512 (10.0)            | 2.25 (1.97 to 2.56)          | 438 (8.5)          | 1.92 (1.67 to 2.20)          |
| Benign biopsy procedures, n (%)                 | 82 (1.1)                    | 146 (2.8)                | 2.06 (1.61 to 2.64)          | 282 (5.5)             | 3.98 (3.19 to 4.97)          | 259 (5.0)          | 3.66 (2.92 to 4.57)          |
| Gleason 6 cancers, n (%)                        | 36 (0.5)                    | 61 (1.2)                 | 2.21 (1.49 to 3.27)          | 85 (1.7)              | 3.07 (2.12 to 4.45)          | 73 (1.4)           | 2.64 (1.80 to 3.86)          |
| Gleason $\geq$ 3+4 cancers, n (%)               | 186 (2.4)                   | 119 (2.3)                | 0.92 (0.73 to 1.15)          | 145 (2.8)             | 1.12 (0.90 to 1.38)          | 106 (2.1)          | 0.82 (0.65 to 1.03)          |
| Gleason $\geq$ 4+3 cancers, n (%)               | 67 (0.9)                    | 42 (0.8)                 | 0.93 (0.63 to 1.36)          | 45 (0.9)              | 1.00 (0.68 to 1.45)          | 43 (0.8)           | 0.95 (0.65 to 1.39)          |
| Referred for biopsy, no biopsy performed, n (%) | 28 (0.4)                    | 87 (1.7)                 | 4.61 (3.01 to 7.04)          | 168 (3.3)             | 8.89 (5.97 to 13.25)         | 165 (3.2)          | 8.73 (5.86 to 13.02)         |
| Number of biopsy cores, Mean                    | 0.6                         | 0.8                      | 0.14 (0.03 to 0.24)          | 1.2                   | 0.57 (0.45 to 0.69)          | 1.0                | 0.40 (0.28 to 0.51)          |
| Number of post-biopsy hospitalizations, n (%)   | 12 (0.2)                    | 10 (0.2)                 | 1.14 (0.50 to 2.60)          | 22 (0.4)              | 2.51 (1.26 to 4.97)          | 17 (0.3)           | 1.94 (0.94 to 3.99)          |

**eTable 2.** Relative Proportion of Men with MRI Scans, Biopsies, and Prostate Cancers According to Screening Strategies (Only Including Men Who Underwent Systematic Biopsies in the MRI-Enhanced Group)

| Outcome/Strategy                                | MRI-enhanced arm (N = 7609) | Biomarker arm (N = 5134) |                              |                       |                              |                    |                              |
|-------------------------------------------------|-----------------------------|--------------------------|------------------------------|-----------------------|------------------------------|--------------------|------------------------------|
|                                                 | PSA $\geq$ 3 ng/ml          | Stockholm3 $\geq$ 15%    | Relative proportion (95% CI) | Stockholm3 $\geq$ 11% | Relative proportion (95% CI) | PSA $\geq$ 3 ng/ml | Relative proportion (95% CI) |
| Participants with elevated test, n (%)          | 929 (12)                    | 413 (8.0)                | 0.66 ( 0.59 to 0.74)         | 680 (13)              | 1.08 (0.99 to 1.19)          | 603 (12)           | 0.96 (0.87 to 1.06)          |
| MRIs, n (%)                                     | 846 (11)                    | 1 (<0.1)                 | -                            | 1 (<0.1)              | -                            | 1 (<0.1)           | -                            |
| Biopsy procedures, n (%)                        | 338 (4.4)                   | 326 (6.3)                | 1.43 ( 1.23 to 1.66)         | 512 (10.0)            | 2.25 (1.97 to 2.56)          | 438 (8.5)          | 1.92 (1.67 to 2.20)          |
| Benign biopsy procedures, n (%)                 | 133 (1.7)                   | 146 (2.8)                | 1.63 ( 1.29 to 2.05)         | 282 (5.5)             | 3.14 (2.56 to 3.85)          | 259 (5.0)          | 2.89 (2.35 to 3.55)          |
| Gleason 6 cancers, n (%)                        | 58 (0.8)                    | 61 (1.2)                 | 1.56 ( 1.09 to 2.23)         | 85 (1.7)              | 2.17 (1.56 to 3.03)          | 73 (1.4)           | 1.87 (1.32 to 2.63)          |
| Gleason $\geq$ 3+4 cancers, n (%)               | 147 (1.9)                   | 119 (2.3)                | 1.20 ( 0.94 to 1.52)         | 145 (2.8)             | 1.46 (1.17 to 1.83)          | 106 (2.1)          | 1.07 (0.83 to 1.37)          |
| Gleason $\geq$ 4+3 cancers, n (%)               | 49 (0.6)                    | 42 (0.8)                 | 1.27 ( 0.84 to 1.92)         | 45 (0.9)              | 1.36 (0.91 to 2.04)          | 43 (0.8)           | 1.30 (0.86 to 1.96)          |
| Referred for biopsy, no biopsy performed, n (%) | 28 (0.4)                    | 87 (1.7)                 | 4.61 ( 3.01 to 7.04)         | 168 (3.3)             | 8.89 (5.97 to 13.25)         | 165 (3.2)          | 8.73 (5.86 to 13.02)         |
| Number of biopsy cores, Mean                    | 0.7                         | 0.8                      | 0.08 (-0.02 to 0.19)         | 1.2                   | 0.52 (0.40 to 0.64)          | 1.0                | 0.34 (0.23 to 0.46)          |
| Number of post-biopsy hospitalizations, n (%)   | 13 (0.2)                    | 10 (0.2)                 | 1.14 ( 0.50 to 2.60)         | 22 (0.4)              | 2.51 (1.26 to 4.97)          | 17 (0.3)           | 1.94 (0.94 to 3.99)          |

**Table 3.** Gleason Score at Biopsy vs at Prostatectomy in Biomarker-Based Group and MRI-Enhanced Group

| Group                                      |                             | Gleason Score at prostatectomy |                   |                   |                          | Total      |
|--------------------------------------------|-----------------------------|--------------------------------|-------------------|-------------------|--------------------------|------------|
|                                            |                             | Gleason Score 6                | Gleason Score 3+4 | Gleason Score 4+3 | Gleason Score $\geq 4+4$ |            |
| MRI-enhanced arm<br>(PSA $\geq 3$ ng/ml)   | Gleason Score biopsy, n (%) |                                |                   |                   |                          |            |
|                                            | Gleason Score 6             | 2 (7.7%)                       | 18 (69%)          | 4 (15%)           | 2 (7.7%)                 | 26 (100%)  |
|                                            | Gleason Score 3+4           | 3 (4.9%)                       | 40 (66%)          | 15 (25%)          | 3 (4.9%)                 | 61 (100%)  |
|                                            | Gleason Score 4+3           | 0 (0%)                         | 3 (23%)           | 10 (77%)          | 0 (0%)                   | 13 (100%)  |
|                                            | Gleason Score $\geq 4+4$    | 0 (0%)                         | 1 (10%)           | 2 (20%)           | 7 (70%)                  | 10 (100%)  |
|                                            | Unknown                     | 0 (0%)                         | 13 (87%)          | 2 (13%)           | 0 (0%)                   | 15 (100%)  |
|                                            | Total, n (%)                | 5 (4.0%)                       | 75 (60%)          | 33 (26%)          | 12 (9.6%)                | 125 (100%) |
| Biomarker arm<br>(Stockholm3 $\geq 15\%$ ) | Gleason Score biopsy, n (%) |                                |                   |                   |                          |            |
|                                            | Gleason Score 6             | 0 (0%)                         | 11 (79%)          | 2 (14%)           | 1 (7.1%)                 | 14 (100%)  |
|                                            | Gleason Score 3+4           | 0 (0%)                         | 27 (87%)          | 4 (13%)           | 0 (0%)                   | 31 (100%)  |
|                                            | Gleason Score 4+3           | 0 (0%)                         | 1 (11%)           | 8 (89%)           | 0 (0%)                   | 9 (100%)   |
|                                            | Gleason Score $\geq 4+4$    | 0 (0%)                         | 0 (0%)            | 3 (75%)           | 1 (25%)                  | 4 (100%)   |
|                                            |                             | Total, n (%)                   | 0 (0%)            | 39 (67%)          | 17 (29%)                 | 2 (3.4%)   |
| Biomarker arm<br>(Stockholm3 $\geq 11\%$ ) | Gleason Score biopsy, n (%) |                                |                   |                   |                          |            |
|                                            | Gleason Score 6             | 0 (0%)                         | 13 (81%)          | 2 (13%)           | 1 (6.3%)                 | 16 (100%)  |
|                                            | Gleason Score 3+4           | 0 (0%)                         | 34 (85%)          | 6 (15%)           | 0 (0%)                   | 40 (100%)  |
|                                            | Gleason Score 4+3           | 0 (0%)                         | 1 (10%)           | 8 (80%)           | 1 (10%)                  | 10 (100%)  |
|                                            | Gleason Score $\geq 4+4$    | 0 (0%)                         | 0 (0%)            | 3 (75%)           | 1 (25%)                  | 4 (100%)   |

|                                       |                             | Gleason Score at prostatectomy |                   |                   |                          |           |
|---------------------------------------|-----------------------------|--------------------------------|-------------------|-------------------|--------------------------|-----------|
| Group                                 |                             | Gleason Score 6                | Gleason Score 3+4 | Gleason Score 4+3 | Gleason Score $\geq$ 4+4 | Total     |
|                                       | Total, n (%)                | 0 (0%)                         | 48 (69%)          | 19 (27%)          | 3 (4.3%)                 | 70 (100%) |
| Biomarker arm (Stockholm3 $\geq$ 15%) | Gleason Score biopsy, n (%) |                                |                   |                   |                          |           |
|                                       | Gleason Score 6             | 0 (0%)                         | 11 (79%)          | 2 (14%)           | 1 (7.1%)                 | 14 (100%) |
|                                       | Gleason Score 3+4           | 0 (0%)                         | 27 (87%)          | 4 (13%)           | 0 (0%)                   | 31 (100%) |
|                                       | Gleason Score 4+3           | 0 (0%)                         | 1 (11%)           | 8 (89%)           | 0 (0%)                   | 9 (100%)  |
|                                       | Gleason Score $\geq$ 4+4    | 0 (0%)                         | 0 (0%)            | 3 (75%)           | 1 (25%)                  | 4 (100%)  |
|                                       | Total, n (%)                | 0 (0%)                         | 39 (67%)          | 17 (29%)          | 2 (3.4%)                 | 58 (100%) |
| Biomarker arm (PSA $\geq$ 3 ng/ml)    | Gleason Score biopsy, n (%) |                                |                   |                   |                          |           |
|                                       | Gleason Score 6             | 0 (0%)                         | 10 (77%)          | 2 (15%)           | 1 (7.7%)                 | 13 (100%) |
|                                       | Gleason Score 3+4           | 0 (0%)                         | 26 (87%)          | 4 (13%)           | 0 (0%)                   | 30 (100%) |
|                                       | Gleason Score 4+3           | 0 (0%)                         | 2 (18%)           | 8 (73%)           | 1 (9.1%)                 | 11 (100%) |
|                                       | Gleason Score $\geq$ 4+4    | 0 (0%)                         | 0 (0%)            | 3 (75%)           | 1 (25%)                  | 4 (100%)  |
|                                       | Total, n (%)                | 0 (0%)                         | 38 (66%)          | 17 (29%)          | 3 (5.2%)                 | 58 (100%) |

**eTable 4.** Gleason Score at Systematic Biopsy vs Combined Systematic and Targeted Biopsy for Men in MRI-Enhanced Group who Underwent Both Types of Biopsies

|                             | Gleason Score at CBx |                 |                   |                   |                          | Total      |
|-----------------------------|----------------------|-----------------|-------------------|-------------------|--------------------------|------------|
|                             | Benign biopsy        | Gleason Score 6 | Gleason Score 3+4 | Gleason Score 4+3 | Gleason Score $\geq 4+4$ |            |
| Gleason Score at SBx, n (%) |                      |                 |                   |                   |                          |            |
| Benign biopsy               | 77 (73%)             | 7 (6.7%)        | 17 (16%)          | 3 (2.9%)          | 1 (1.0%)                 | 105 (100%) |
| Gleason Score 6             | 0 (0%)               | 28 (54%)        | 20 (38%)          | 3 (5.8%)          | 1 (1.9%)                 | 52 (100%)  |
| Gleason Score 3+4           | 0 (0%)               | 0 (0%)          | 77 (89%)          | 7 (8.0%)          | 3 (3.4%)                 | 87 (100%)  |
| Gleason Score 4+3           | 0 (0%)               | 0 (0%)          | 0 (0%)            | 16 (80%)          | 4 (20%)                  | 20 (100%)  |
| Gleason Score $\geq 4+4$    | 0 (0%)               | 0 (0%)          | 0 (0%)            | 0 (0%)            | 25 (100%)                | 25 (100%)  |
| Total, n (%)                | 77 (27%)             | 35 (12%)        | 114 (39%)         | 29 (10%)          | 34 (12%)                 | 289 (100%) |

**eFigure.** Gleason Score on Systematic Biopsy vs Combined Systematic and Targeted Biopsy for Men in MRI-Enhanced Group who Underwent Both Types of Biopsies

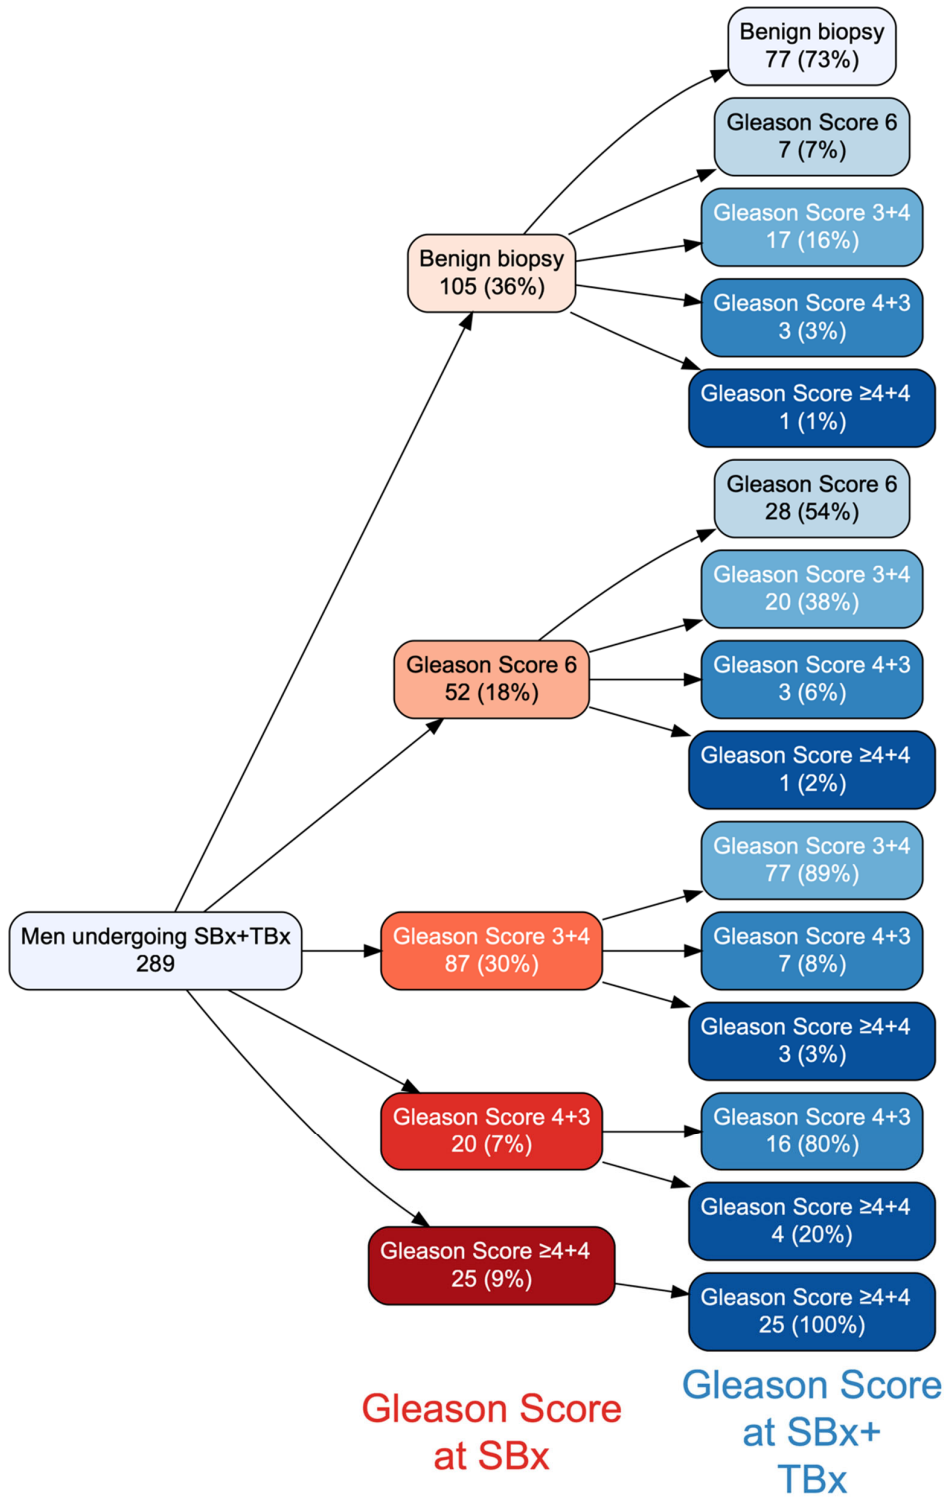

Supplement: jamanetwopen-e247131-s002.pdf [file jamanetwopen-e247131-s002.pdf]
